# Supplementary material for: Relationship between obesity and iron metabolism: Insights from NHANES and Mendelian randomization studies
Source: Research Square preprint supplement (doi:10.21203/rs.3.rs-4503071/v1), 2024-06-12
Supplement: Supplementary file 1 [file 3357c8c8814b4e409d035120.docx]

**Figure S1.** Scatter plot of BMI versus iron metabolism with linear regression.


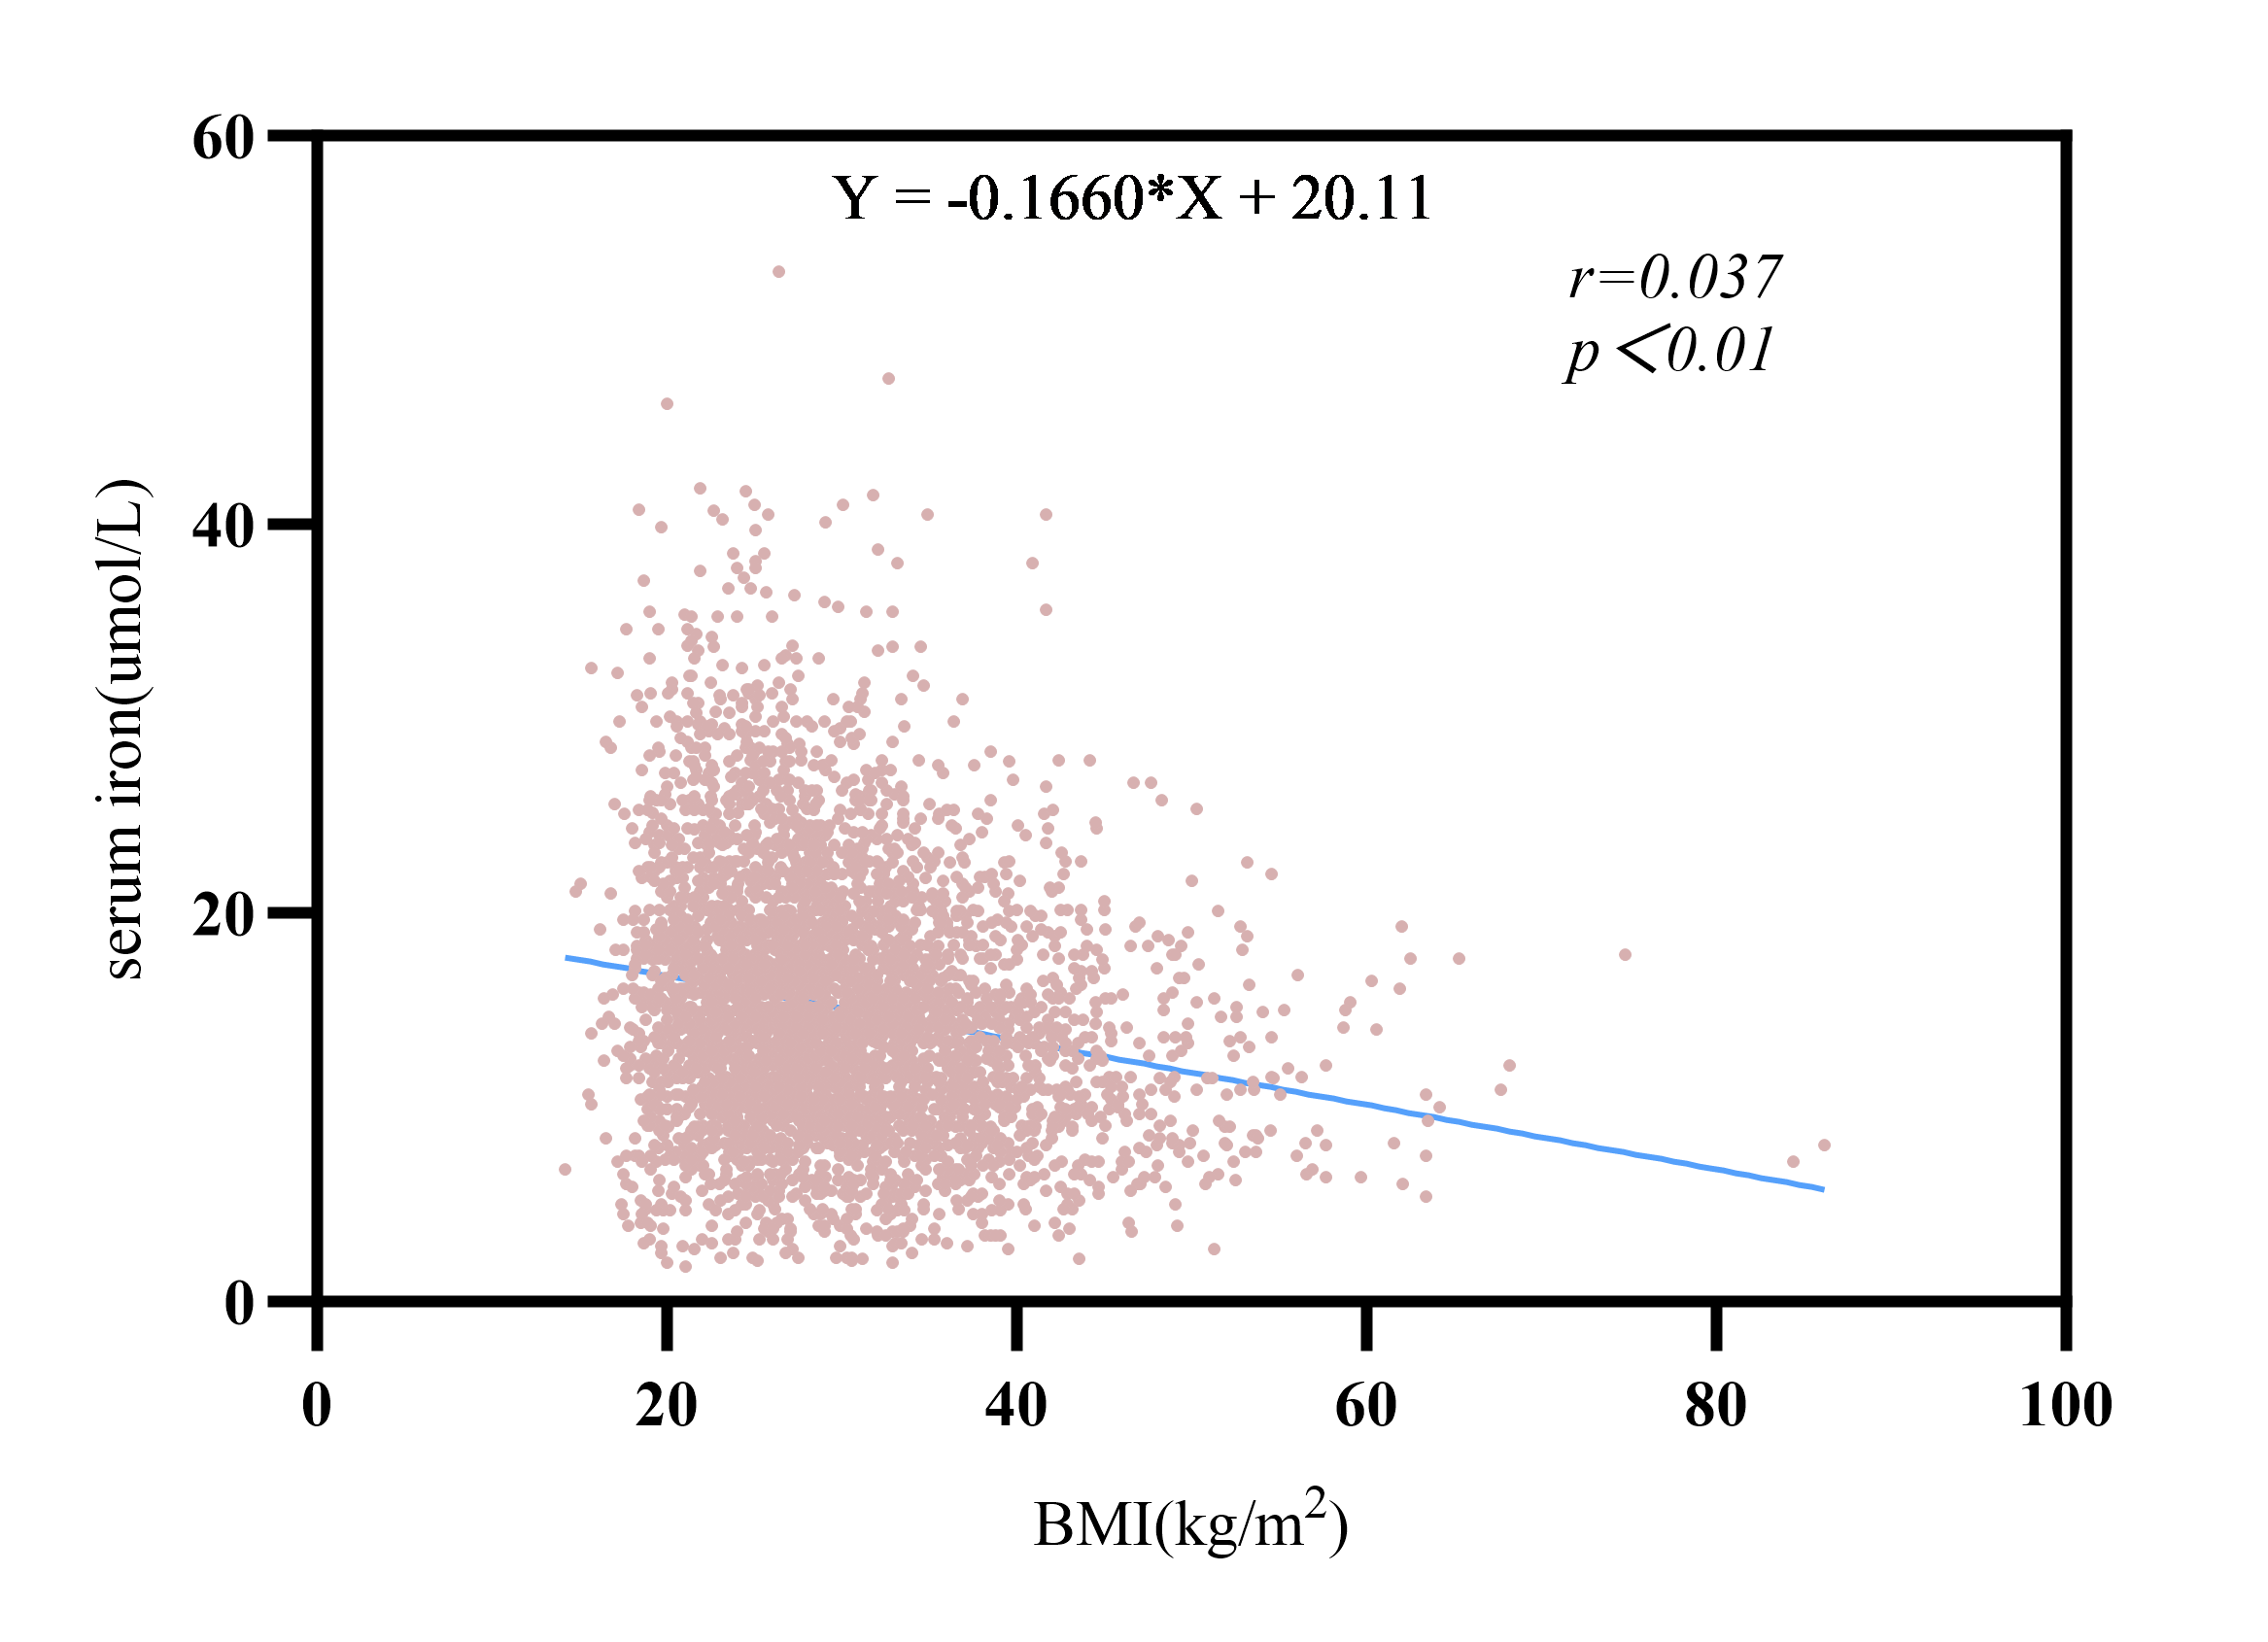

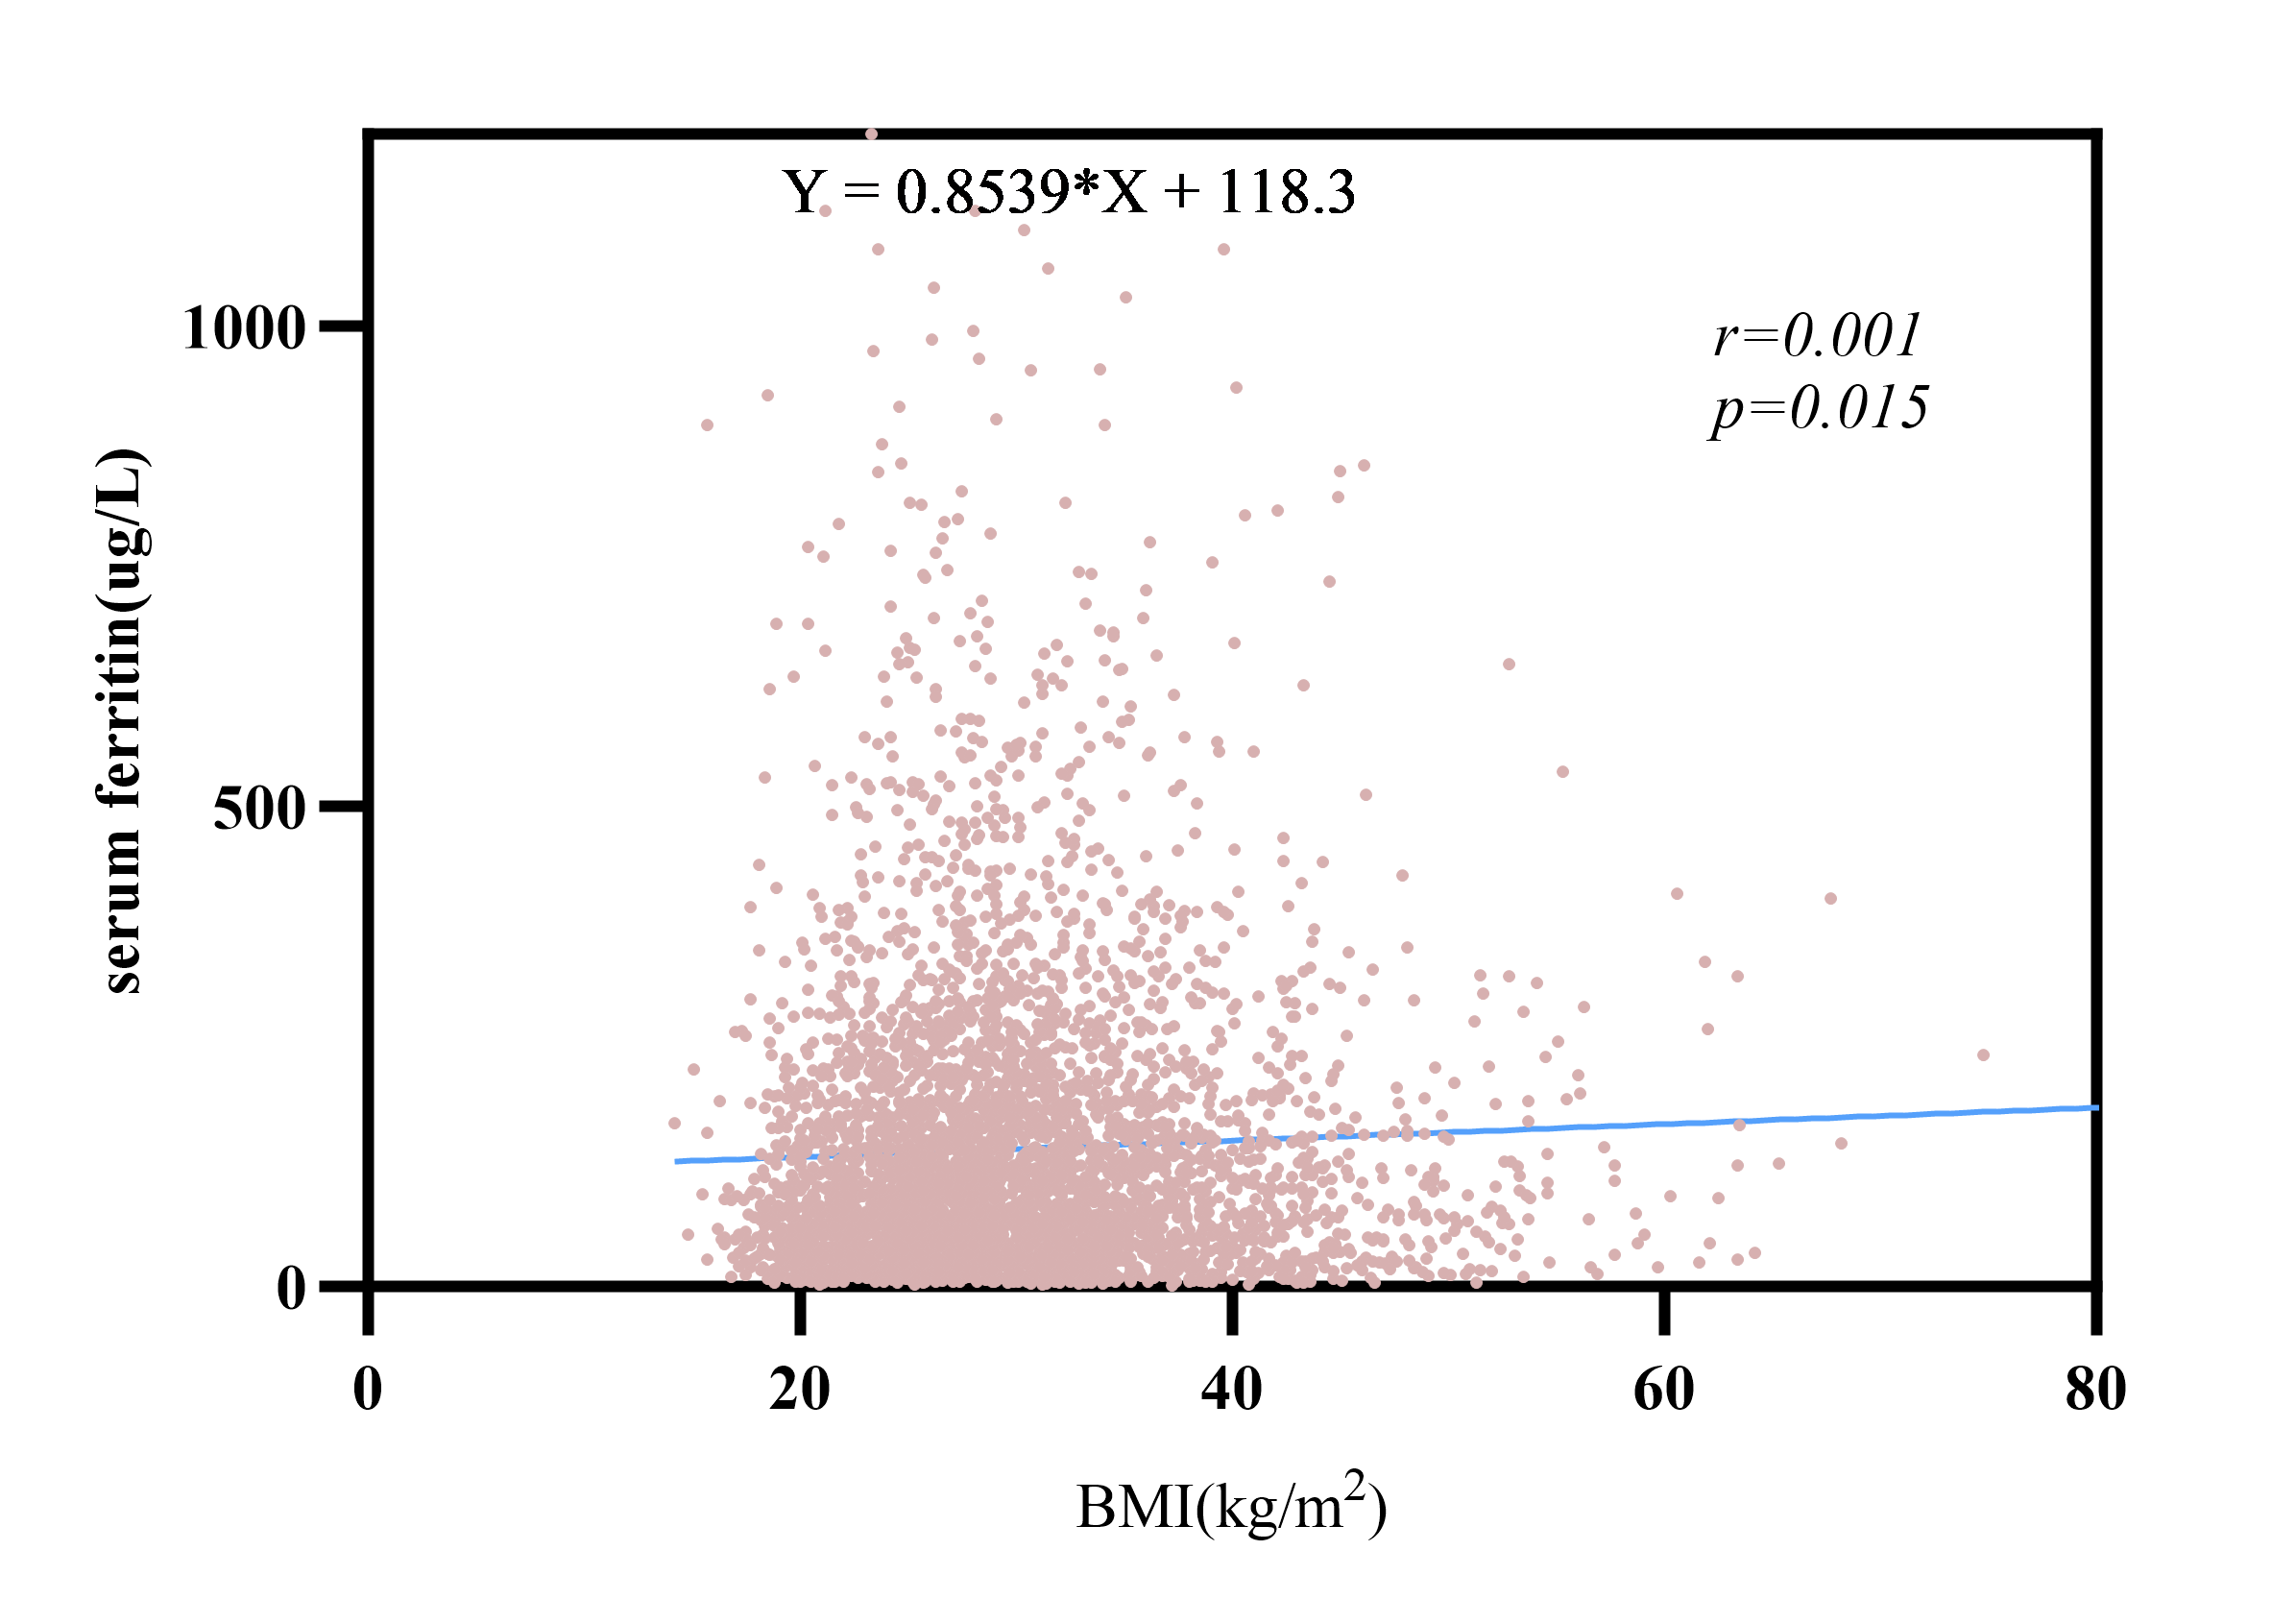


a b


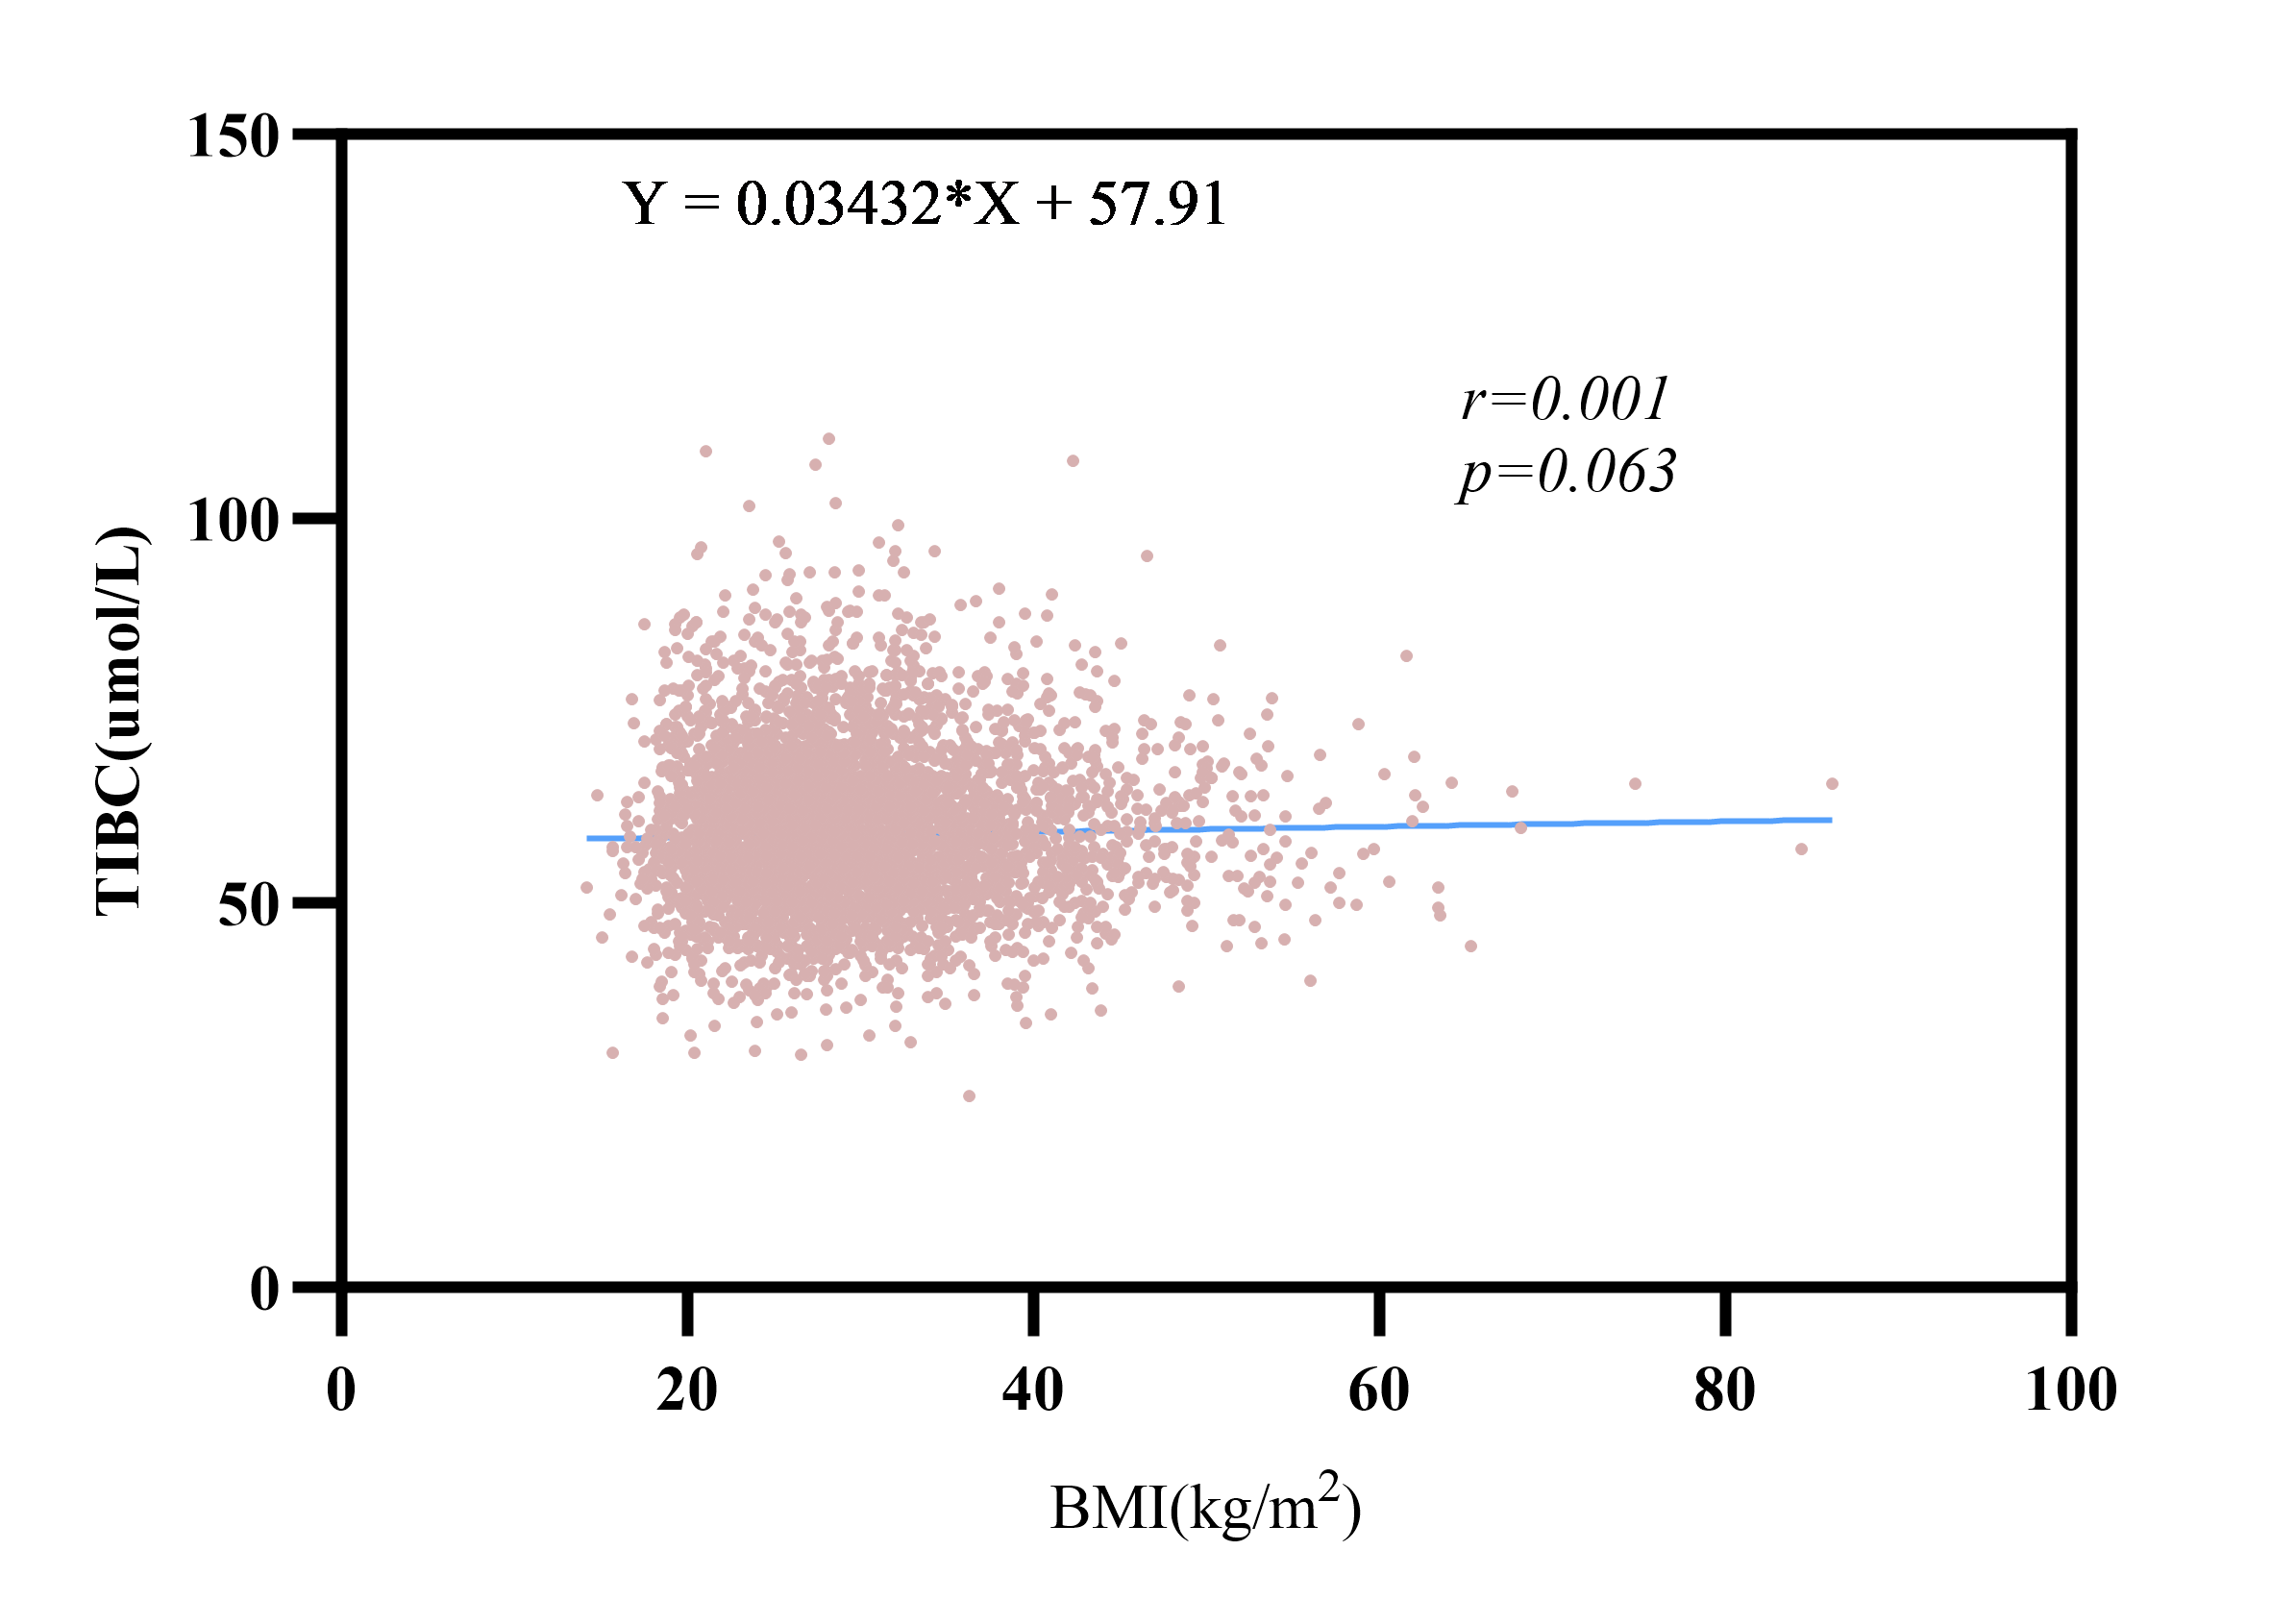

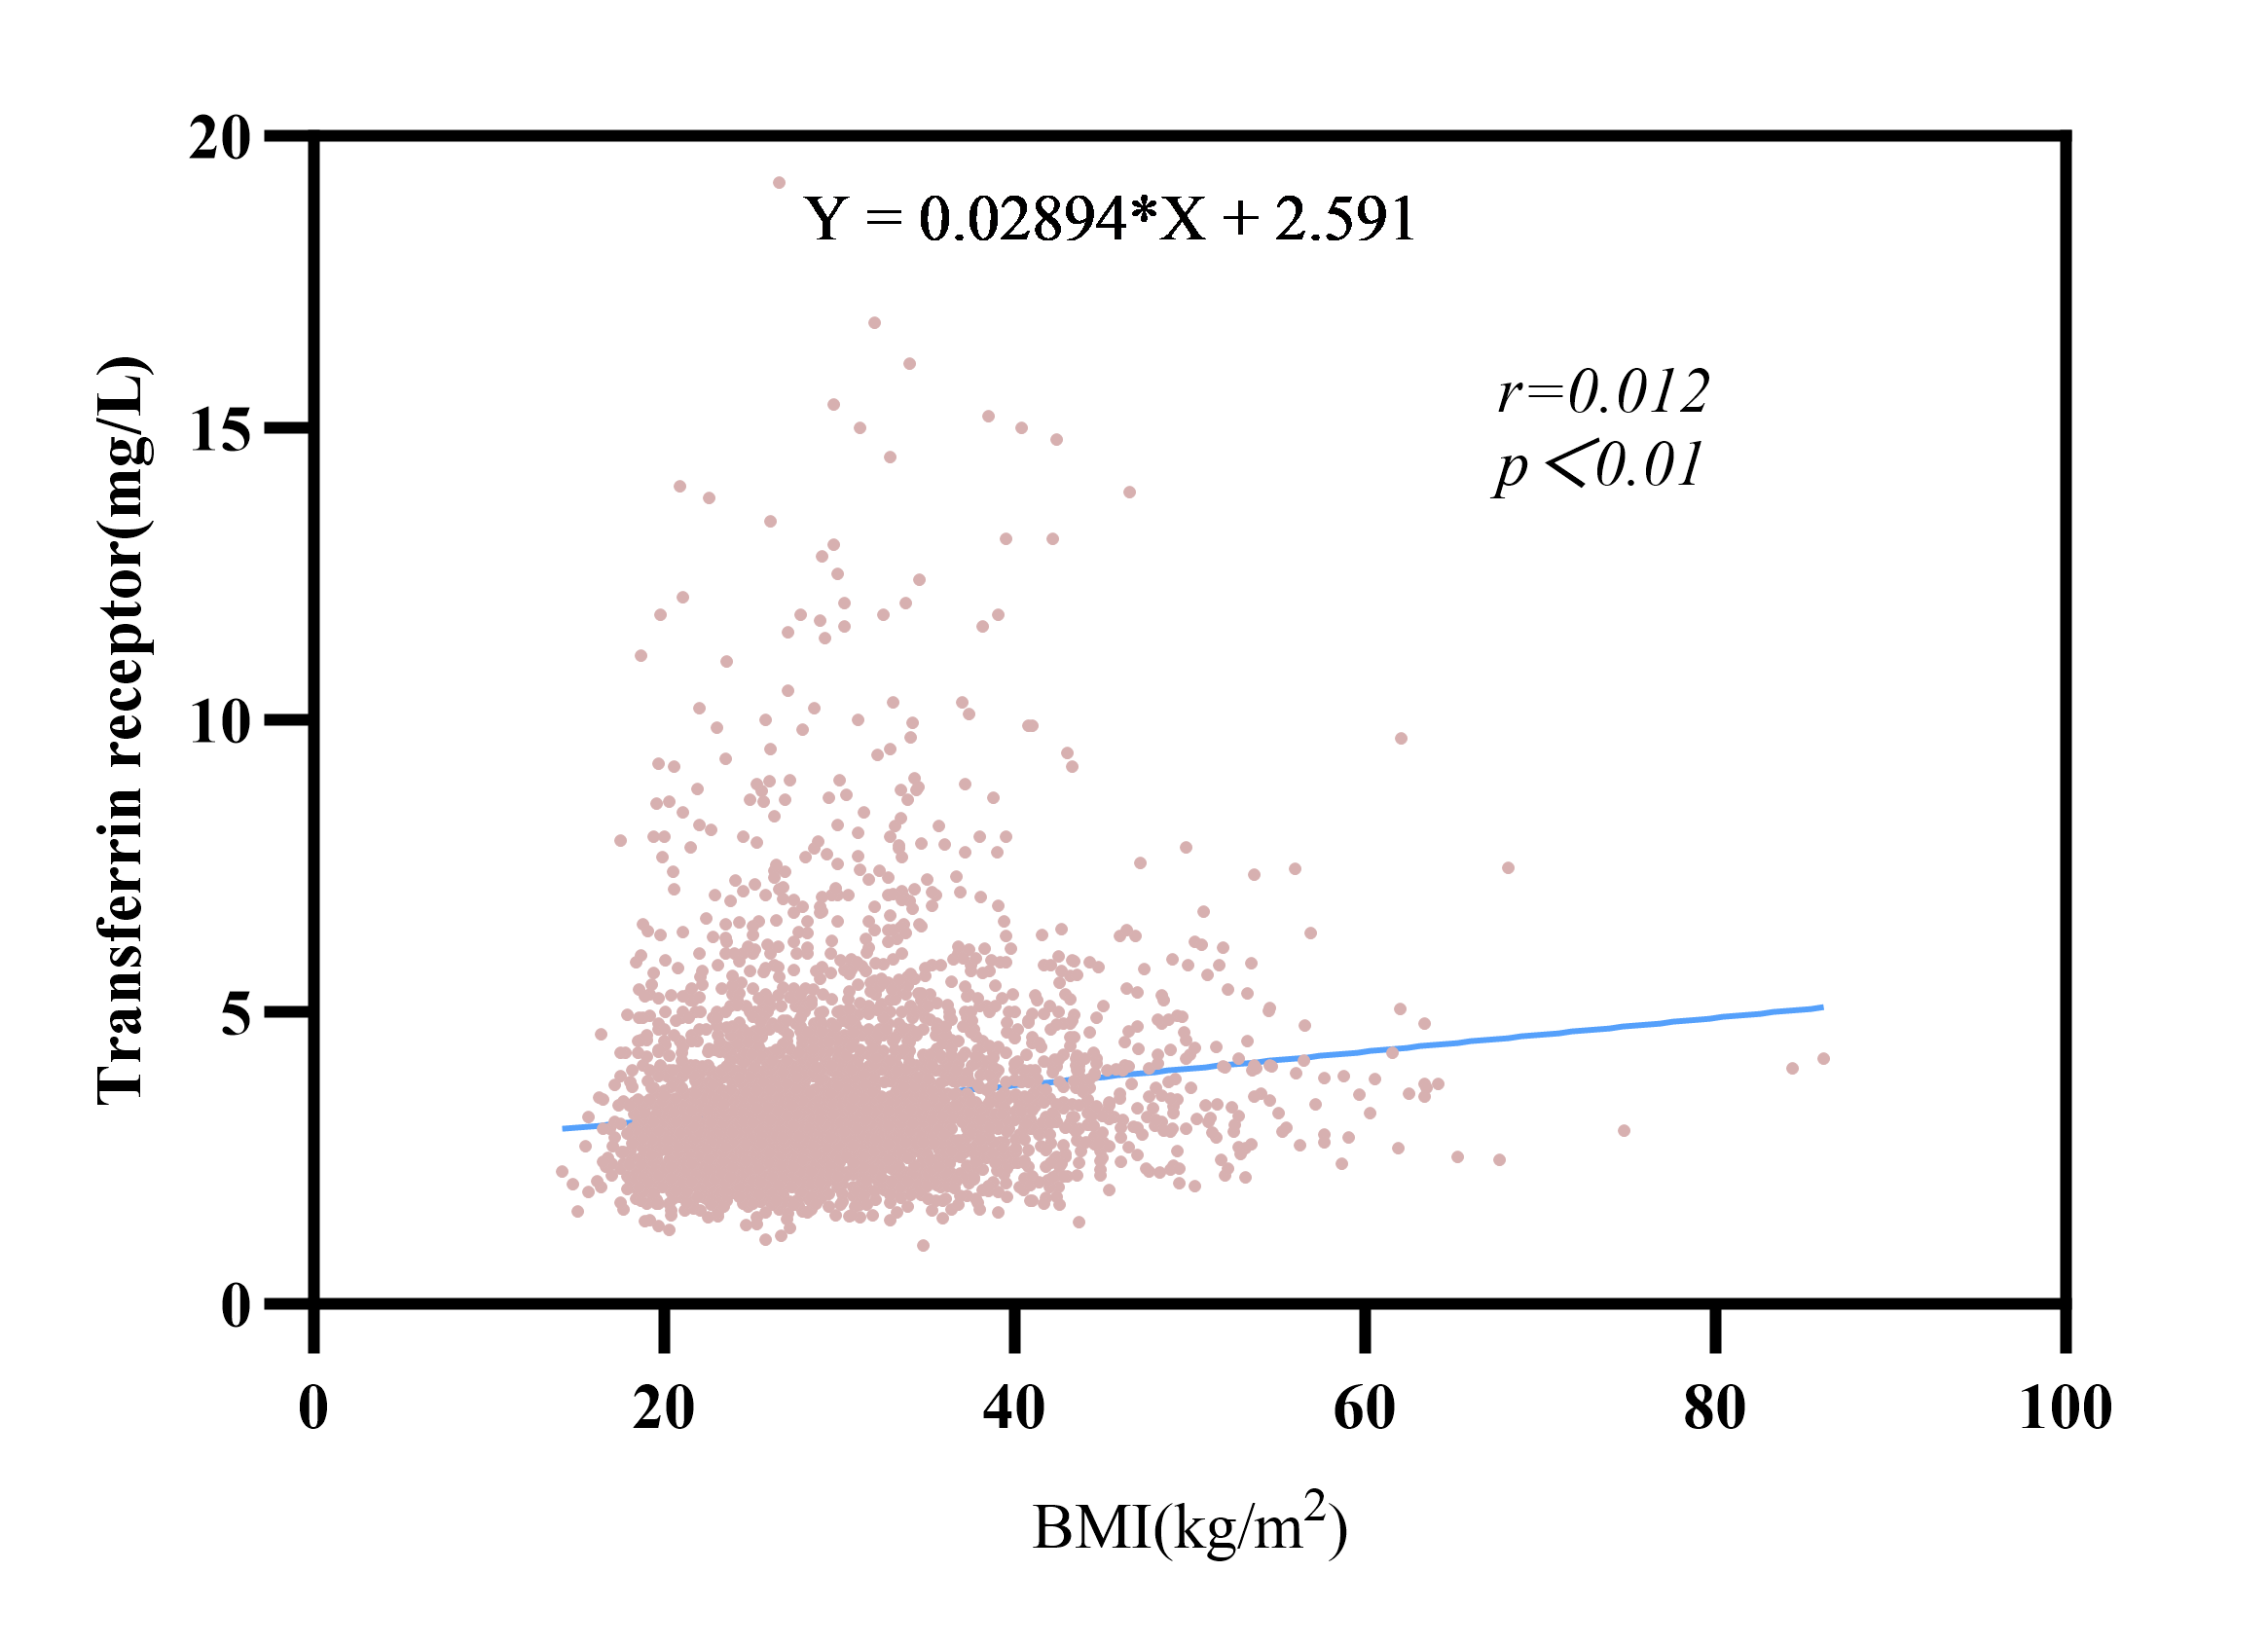


c d


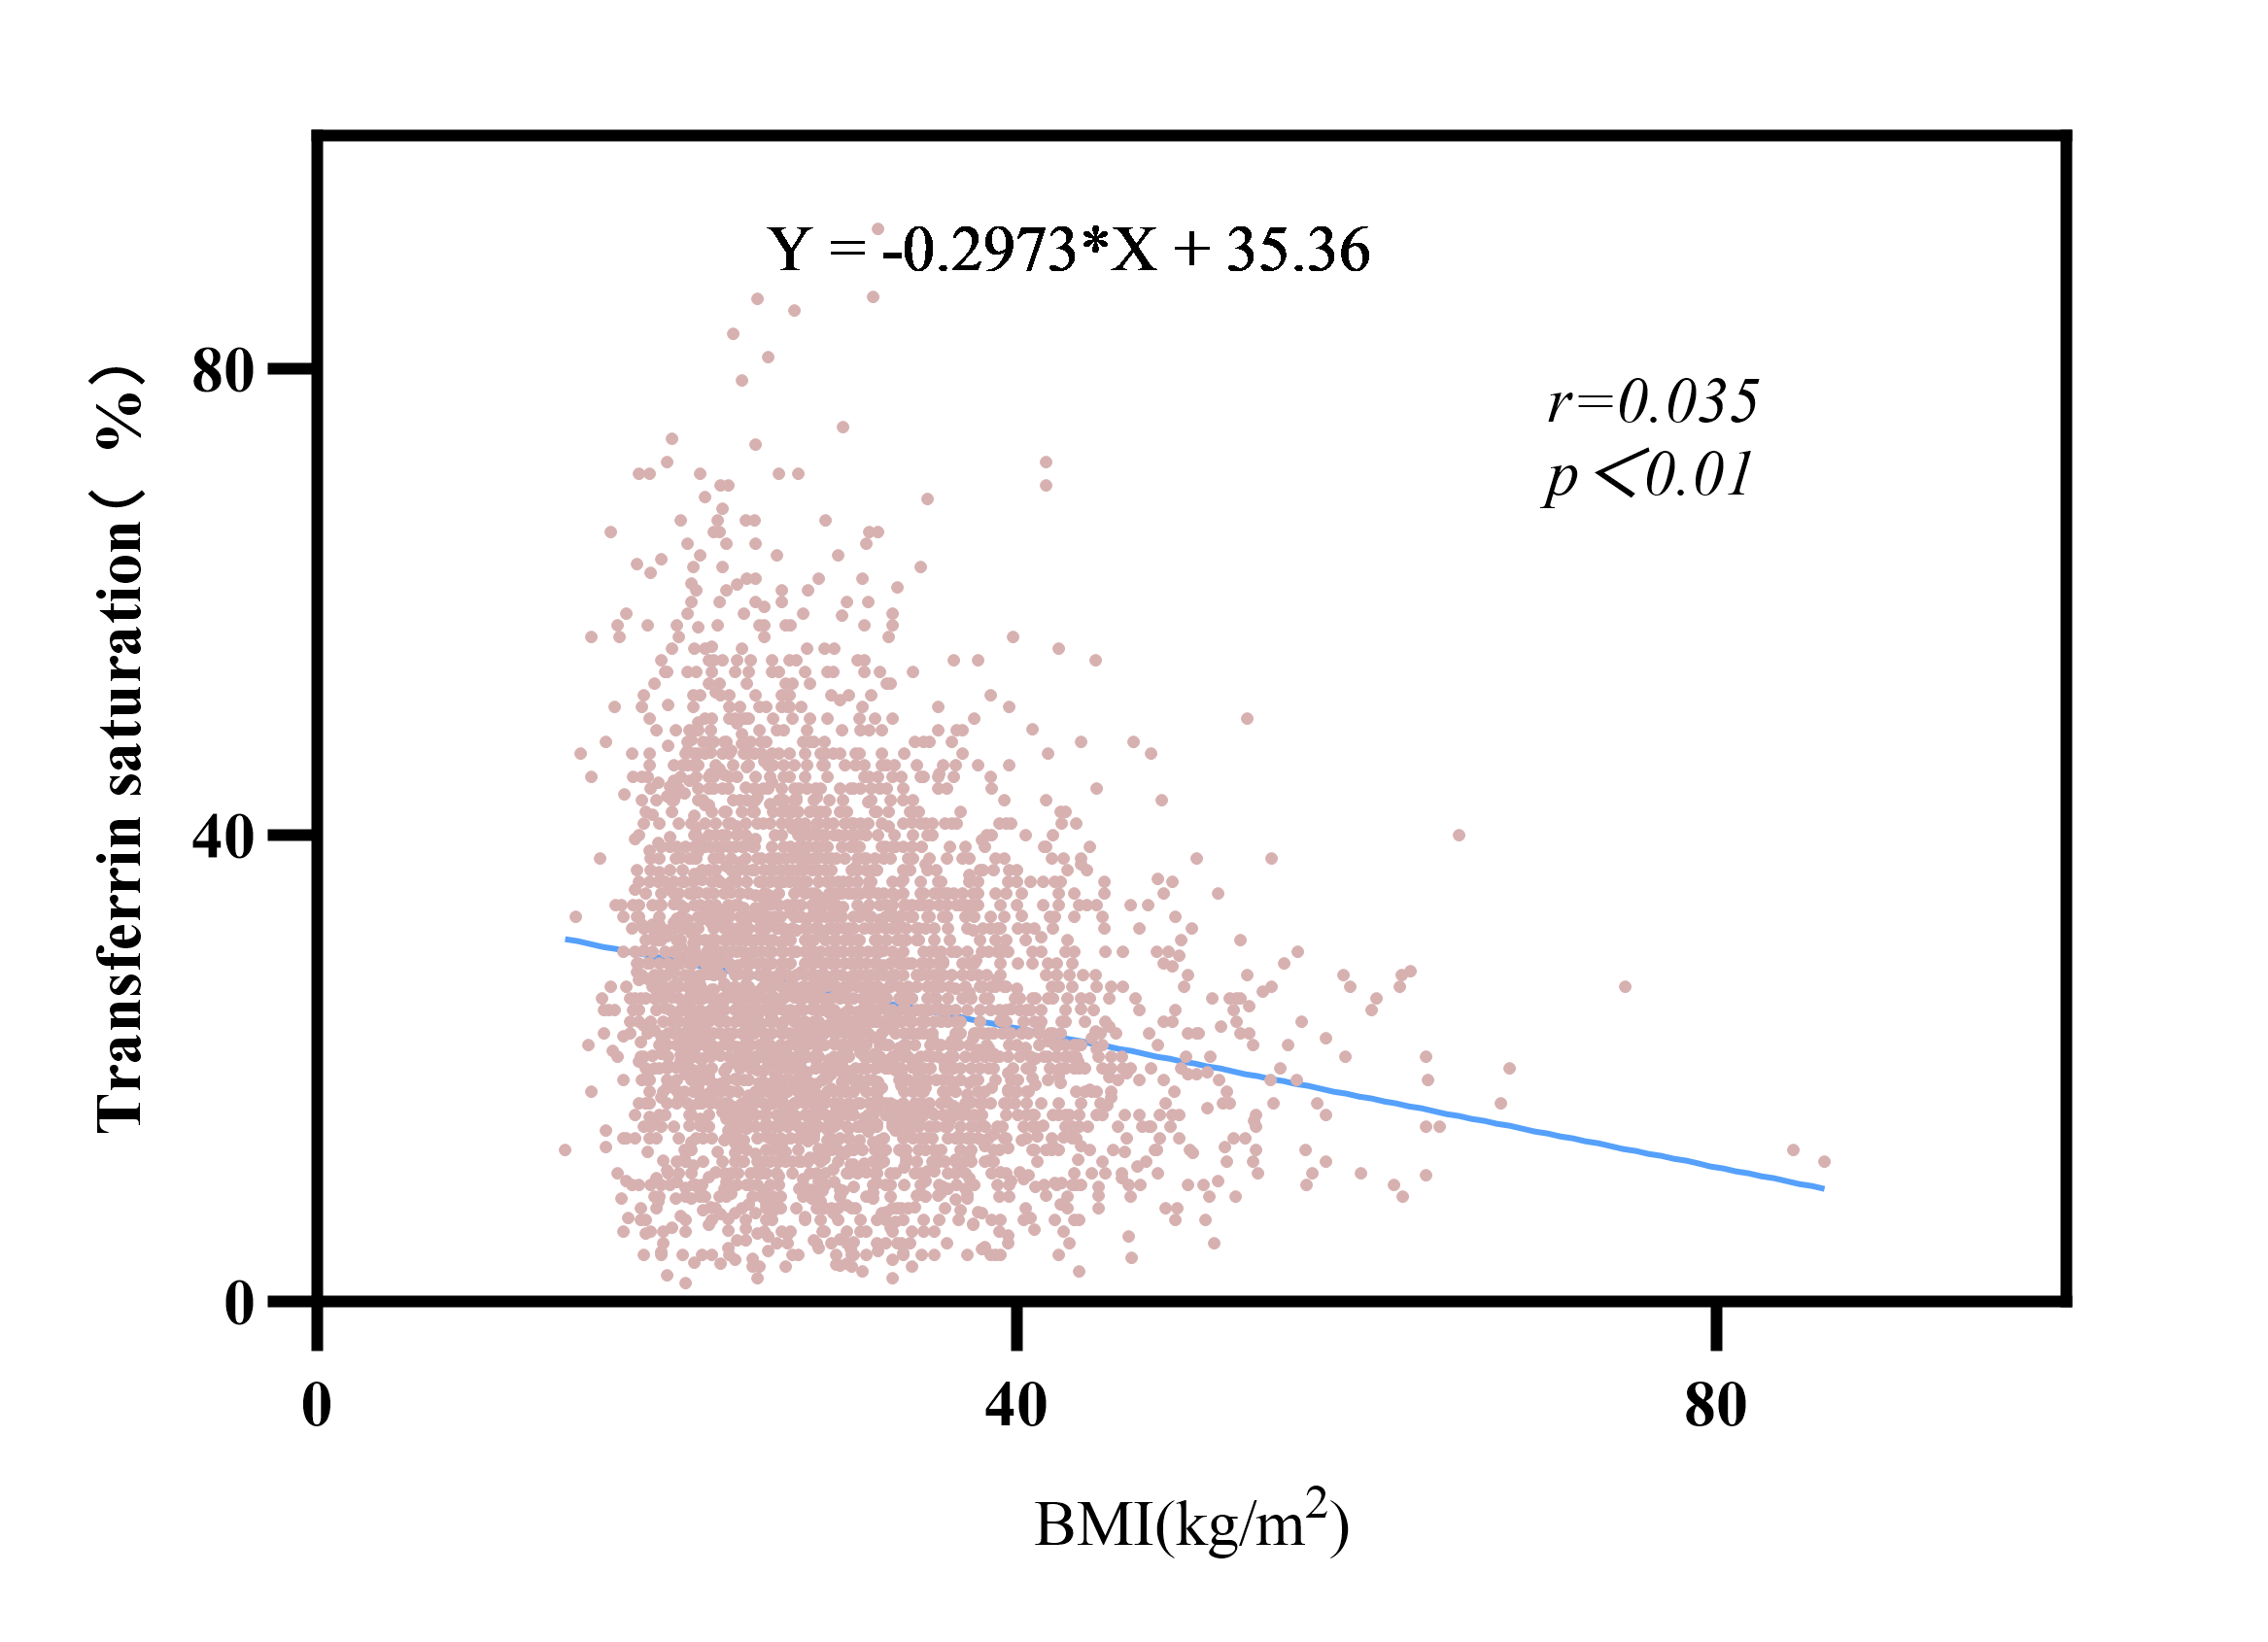


e

a: The relationship between BMI and serum iron;

b: The relationship between BMI and serum ferritin;

c: The relationship between BMI and total iron binding force;

d: The relationship between BMI and soluble transferrin receptor;

e: The relationship between BMI and transferrin saturation.

**Figure S2.** Levels of iron metabolism between obese and non-obese groups


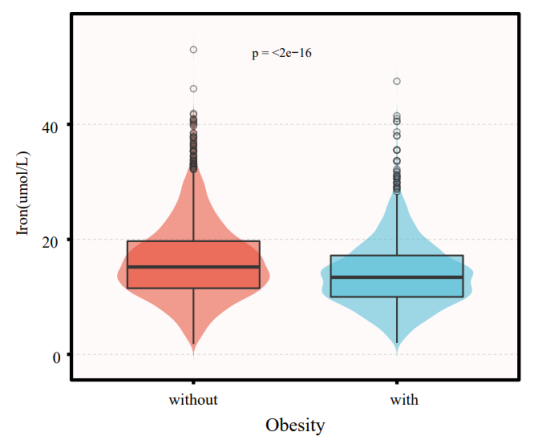

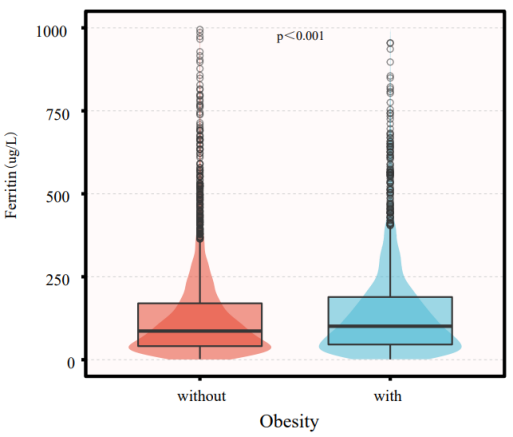


a b


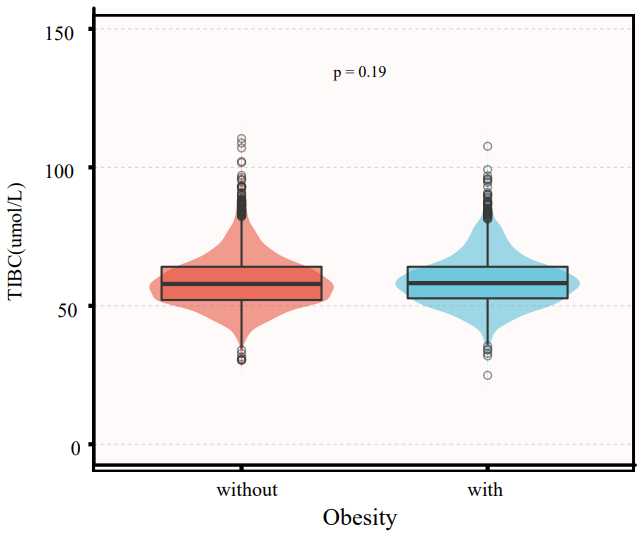

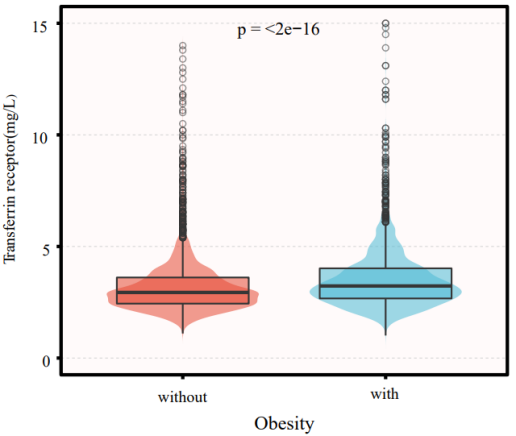


c d


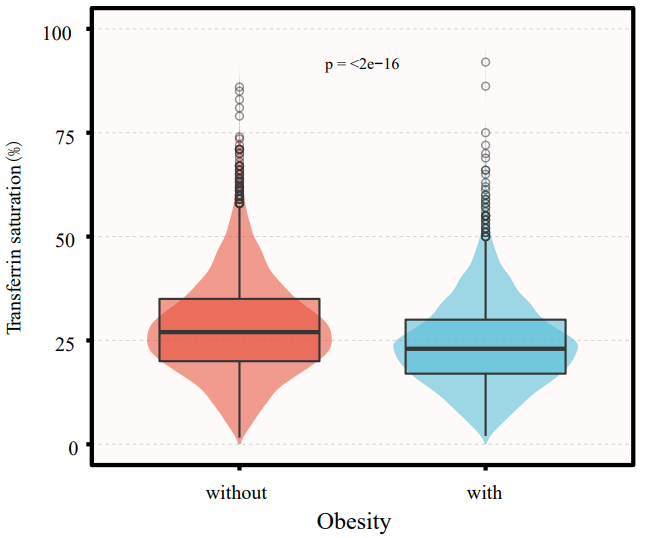


e

**a:** Serum iron frozen between obese and non-obese groups;

**b**: Serum ferritin between obese and non-obese groups;

**c:** The total iron binding capacity between obese and non-obese groups;

**d:** Transferrin receptor between obese and non-obese groups;

**e:** Transferrin saturation between obese and non-obese groups;

**Table S1 Association of covariates and obesity**

| **Variable** | **β(95CI%)** | ***P*** |
| --- | --- | --- |
| Age (years) | 0.01 (0.00,0.03) | 0.029 |
| Gender(%) |  |  |
| Male | 1(reference) |  |
| Fmale | 0.32 (-0.10,0.74) | 0.133 |
| **Race(%)** |  |  |
| Non-Hispanic white | 1(reference) |  |
| Non-Hispanic black | 1.84 (1.30,2.38) | < 0.001 |
| Mexican American | 0.96 (0.33,1.59) | 0.003 |
| Others | -1.45 (-1.98,-0.93) | < 0.001 |
| **Education level (years)** |  |  |
| <9 | 1(reference) |  |
| 9-12 | 0.19 (-0.67,1.05) | 0.665 |
| >12 | -0.14 (-0.98,0.69) | 0.741 |
| **Marital status** |  |  |
| Married or living with a partner | 1(reference) |  |
| Living alone | 0.24 (-0.18,0.66) | 0.268 |
| **Family income(%)** |  |  |
| Low | 1(reference) |  |
| Medium | 0.01 (-0.49,0.51) | 0.983 |
| High | -1.08 (-1.62,-0.55) | < 0.001 |
| **Diabetes**（**%**） |  |  |
| No | 1(reference) |  |
| Yes | 3.61 (3.02,4.20) | < 0.001 |
| **Hypertension(%)** |  |  |
| No | 1(reference) |  |
| Yes | 3.35 (2.90,3.80) | < 0.001 |
| **Smoking** |  |  |
| Never | 1(reference) |  |
| Former | 1.34 (0.83,1.85) | < 0.001 |
| Now | -0.44 (-0.98,0.10) | 0.107 |
| SI(umol/L) | -0.23 (-0.26,-0.19) | < 0.001 |
| SF(ug/L) | 0.00(0.00,0.00) | 0.015 |
| sTfR (mg/L) | 0.44 (0.33,0.54) | < 0.001 |
| TSAT(%) | -0.12 (-0.14,-0.10) | < 0.001 |
| TIBC(umol/L) | 0.02 (0.00,0.04) | 0.063 |
| CRP(mg/L) | 0.26 (0.24,0.29) | < 0.001 |
| Total cholesterol(mmol/L) | 0.07 (-0.13,0.27) | 0.484 |
| HDL(mmol/L) | -5.26 (-5.75,-4.77) | < 0.001 |
| WBC(103/uL) | 0.09 (0.06,0.12) | < 0.001 |
| Neutrophils(103/uL) | 0.73 (0.61,0.84) | < 0.001 |
| Eosinophils(103/uL) | 3.10 (1.85,4.34) | < 0.001 |
| RBC(106/uL) | 1.78 (1.36,2.20) | < 0.001 |
| MCV(fL) | -0.22 (-0.25,-0.19) | < 0.001 |
| RDW(%) | 1.05 (0.91,1.19) | < 0.001 |
| PLT(103/uL) | 0.02 (0.01,0.02) | < 0.001 |

Abbreviations: HDL, high-density lipoprotein cholesterol; RBC, red blood cell count; MCV, mean cell volume;

RDW, red cell distribution width; WBC, white blood cell count; CRP, hypersensitive C-reactive protein; SI, serum iron; SF, serum ferritin; TSAT, transferrin saturation; sTfR, soluble transferrin receptor; TIBC: total iron binding force; PLT, platelet; β, beta; 95% CI, 95% confidence interv.

**Table S2. Overview of GWAS data used in MR Analyses**

| **Phenotype** | **Consortium/cohort** | **Ancestry** | **No of participants (case/control)** | **Author** | **Year of publication** | **PubMed ID** |
| --- | --- | --- | --- | --- | --- | --- |
| Body mass index | GIANT+ UK Biobank | European | 681,275 | Yengo, et al. | 2018 | 30124842 |
| GIANT | European | 339,224 | Locke, et al | 2014 | 25673413 |
| Serum iron | GIS | European | 23,986 | Benyamin, et al. | 2014 | 25352340 |
| Liver iron content | UK Biobank | European | 32,858 | Liu, et al. | 2021 | 34128465 |
| Spleen iron content | UK Biobank | European | 35,324 | Sorokin, et al. | 2022 | 35568031 |
| Pancreas iron content | UK Biobank | European | 32,858 | Liu, et al. | 2021 | 34128465 |
| Ferritin | GIS | European | 23,986 | Benyamin, et al. | 2014 | 25352340 |
| Transferrin Saturation | GIS | European | 23,986 | Benyamin, et al. | 2014 | 25352340 |
| Transferrin receptor | INTERVAL (UK) | European | 3,301 | Sun, et al | 2018 | 29875488 |

**Table S3. Mendelian randomization analysis of the causal estimates of body mass index on various iron status.**

| Exposure | Outcome | No. of SNP | Methods | MR results | | Heterogeneity test | | Pleiotropy test | |
| --- | --- | --- | --- | --- | --- | --- | --- | --- | --- |
| β / β (95%CI) | p-value | Q statistic | Q p-value | Egger intercept | p-value |
| Body mass index (GIANT+ UK Biobank) | Serum iron (GIS) | 437 | **IVW** | **-0.073 (-0.14 ~ -0.0049)** | **0.036** | 486.74 | 0.044 |  |  |
| MR Egger | -0.20 (-0.38 ~ -0.025) | 0.026 | 489.44 | 0.039 | 0.0023 | 0.12 |
| Weighted median | -0.077 (-0.20 ~ 0.042) | 0.20 |  |  |  |  |
| Body mass index (GIANT) | Serum iron (GIS) | 73 | IVW | -0.085 (-0.19 ~ 0.015) | 0.097 | 83.53 | 0.16 |  |  |
| MR Egger | -0.11 (-0.36 ~ 0.13) | 0.36 | 83.61 | 0.15 | 0.00087 | 0.80 |
| Weighted median | -0.05 (-0.20 ~ 0.098) | 0.077 |  |  |  |  |
| Body mass index (GIANT) | Liver iron content (UK Biobank) | 79 | **IVW** | **-0.076 (-0.16 ~ -0.0043)** | **0.041** | 97.09 | 0.061 |  |  |
| MR Egger | -0.25 (-0.44 ~ -0.061) | 0.012 | 102.05 | 0.035 | 0.0054 | 0.051 |
| Weighted median | -0.16 (-0.28 ~ -0.041) | 0.063 |  |  |  |  |
| Body mass index (GIANT) | Pancreas iron content (UK Biobank) | 79 | **IVW** | **-0.13 (-0.21 ~ -0.05)** | **0.0014** | 76.97 | 0.51 |  |  |
| MR Egger | -0.23 (-0.42 ~ -0.042) | 0.019 | 75.56 | 0.52 | 0.0032 | 0.24 |
| Weighted median | -0.20 (-0.32~-0.74) | 0.0018 |  |  |  |  |
| Body mass index (GIANT) | Spleen iron content (UK Biobank) | 79 | IVW | -0.013 (-0.099 ~ 0.074) | **0.78** | 114.91 | 0.0042 |  |  |
| MR Egger | -0.18 (-0.40 ~ 0.020) | 0.08 | 110.20 | 0.0078 | 0.0054 | 0.073 |
| Weighted median | -0.023 (-0.15 ~ 0.10) | 0.71 |  |  |  |  |
| Body mass index (GIANT+ UK Biobank) | Ferritin | 427 | **IVW** | **0.14 (0.069 ~ 0.21)** | **0.035** | 527.87 | 0.00054 |  |  |
| MR Egger | 0.0046 (-0.18 ~ 0.19) | 0.96 | 524.98 | 0.00065 | 0.0023 | 0.13 |
| Weighted median | 0.090 (-0.022 ~ 0.20) | 0.12 |  |  |  |  |
| Body mass index (GIANT+ UK Biobank) | Transferrin Saturation | 436 | **IVW** | **-0.11 (-0.18 ~ -0.04)** | **0.0014** | 472.34 | 0.10 |  |  |
| MR Egger | -0.29 (-0.46 ~ 0.11) | 0.0015 | 467.43 | 0.13 | 0.0031 | 0.033 |
| Weighted median | -0.16 (-0.28 ~ 0.047) | 0.005 |  |  |  |  |
| Body mass index (GIANT) | Transferrin receptor | 79 | IVW | 0.090 (-0.13 ~ -0.31) | **0.43** | 66.76 | 0.81 |  |  |
| MR Egger | -0.0075 (-0.55 ~ 0.54) | 0.97 | 66.61 | 0.79 | 0.0030 | 0.70 |
| Weighted median | 0.026 (-0.35 ~ 0.40) | 0.19 |  |  |  |  |

IVW: inverse variance-weighted method; SNP, Single-nucleotide polymorphism; β, beta; 95% CI, 95% confidence interv; MR, mendelian randomizat

**Table S4. Mendelian randomization analysis of the causal estimates of various iron status on body mass index.**

| Exposure | Outcome | No. of SNP | Methods | MR results | | Heterogeneity test | | Pleiotropy test | |
| --- | --- | --- | --- | --- | --- | --- | --- | --- | --- |
| β / β (95%CI) | p-value | Q statistic | Q p-value | Egger intercept | p-value |
| Serum iron (GIS) | Body mass index (GIANT+ UK Biobank) | 3 | IVW | -0.017 (-0.041 ~ -0.0079) | **0.18** | 8.45 | 0.015 |  |  |
| MR Egger | -0.026 (-0.091 ~ 0.039) | 0.58 | 7.65 | 0.0057 | 0.0021 | 0.80 |
| Weighted median | -0.030 (-0.046 ~ -0.014) | 0.0033 |  |  |  |  |
| Serum iron (GIS) | Body mass index (GIANT) | 3 | IVW | -0.0007 (-0.024 ~ 0.023) | **0.95** | 2.10 | 0.35 |  |  |
| MR Egger | -0.014 (-0.077 ~ 0.050) | 0.74 | 1.74 | 0.19 | 0.0027 | 0.73 |
| Weighted median | -0.0024 (-0.027 ~ 0.022) | 0.85 |  |  |  |  |
| Liver iron content (UK Biobank) | Body mass index (GIANT) | 5 | IVW | -0.0054 (-0.050 ~ -0.039) | **0.81** | 16.70 | 0.0012 |  |  |
| MR Egger | -0.014 (-0.081 ~ 0.053) | 0.71 | 16.69 | 0.0022 | 0.0023 | 0.73 |
| Weighted median | -0.0071 (-0.030 ~ -0.016) | 0.55 |  |  |  |  |
| Pancreas iron content (UK Biobank) | Body mass index (GIANT) | 1 | Wald ratio | 0.067 (-0.091 ~ 0.23) | **0.40** |  |  |  |  |
| Spleen iron content (UK Biobank) | Body mass index (GIANT) | 2 | IVW | -0.029 (-0.11 ~ 0.049) | **0.46** | 0.27 | 0.60 |  |  |
| Ferritin | Body mass index (GIANT+ UK Biobank) | 4 | **IVW** | **-0.043 (-0.065 ~ -0.021)** | **0.00015** | 2.5 | 0.47 |  |  |
| MR Egger | -0.066 (-0.11 ~ -0.025) | 0.089 | 0.81 | 0.67 | 0.0026 | 0.32 |
| Weighted median | -0.041 (-0.068 ~ -0.014) | 0.013 |  |  |  |  |
| Transferrin Saturation | Body mass index (GIANT+ UK Biobank) | 3 | IVW | -0.013 (-0.030 ~ -0.0057) | **0.18** | 8.06 | 0.017 |  |  |
| MR Egger | -0.029 (-0.44 ~ 0.14) | 0.16 | 0.50 | 0.48 | 0.0053 | 0.22 |
| Weighted median | -0.013 (-0.022 ~ -0.0032) | 0.0083 |  |  |  |  |
| Transferrin receptor | Body mass index (GIANT) | 2 | IVW | -0.011 (-0.034 ~ -0.011) | **0.36** | 0.081 | 0.78 |  |  |

IVW: inverse variance-weighted method; SNP, Single-nucleotide polymorphism; β, beta; 95% CI, 95% confidence interv; MR, mendelian randomizat
